# Supplementary material for: Transfer of Visual Learning Between a Virtual and a Real Environment in Honey Bees: The Role of Active Vision
Source: PubMed Central journal article supplement (PMC6053632; doi:10.3389/fnbeh.2018.00139), 2018-07-13
Supplement: Image_2.pdf [file Image_2.pdf]

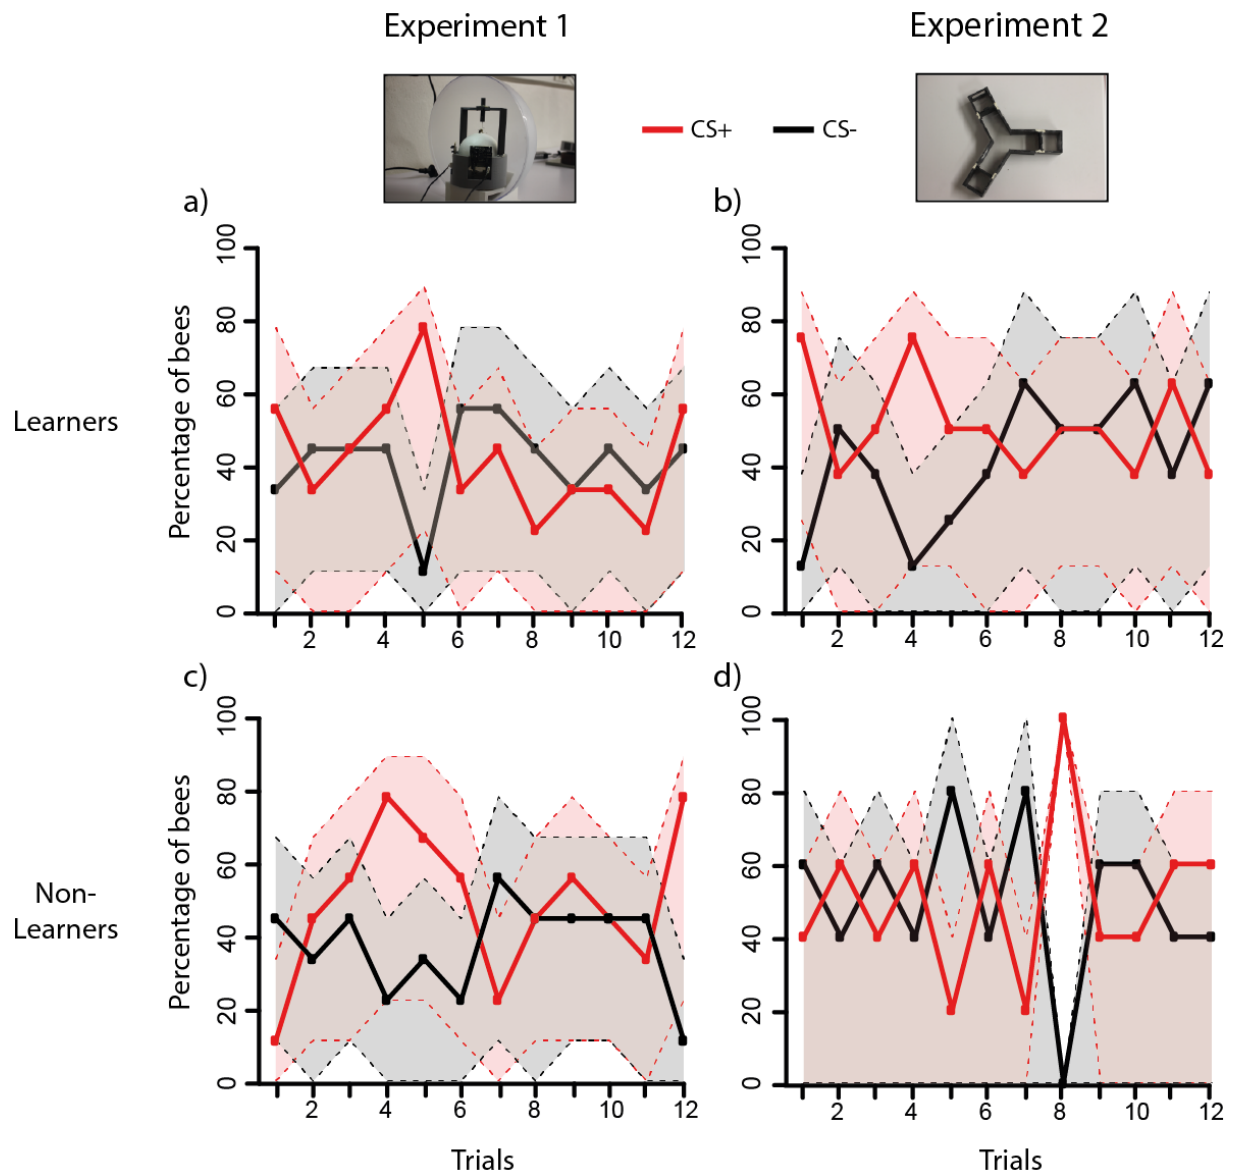

**Figure S2. Acquisition performance of bees (learners and non-learners) during Experiments 1 and 2.** The graphs show the proportion of bees choosing first the CS+ (red curve) or the CS- (black curve) during the twelve conditioning trials. **(a)** Acquisition performance of bees categorized as learners in the post-test of Experiment 1 in the VR setup (i.e. bees that chose the CS+ in the post-test of Experiment 1); **(b)** acquisition performance of bees categorized as learners in the post-test of Experiment 2 in the Y-maze (i.e. bees that chose the CS+ in the post-test of Experiment 2). **(c)** Same as in **(a)** but for bees categorized as non-learners (i.e. bees that chose the CS- in the post-test of Experiment 1). **(d)** Same as in **(b)** but for bees categorized as non-learners (i.e. bees that chose the CS- in the post-test of Experiment 2). Grey and pink areas around the curves represent the 95% confidence interval of CS+ and CS- choices, respectively.
